# Supplementary material
Source: PubMed Central journal article supplement (PMC6851343)
Supplement: supp_RA119.010023_154050_2_supp_403711_pyp41m.pdf [file supp_RA119.010023_154050_2_supp_403711_pyp41m.pdf]

Zinc excess increases cellular demand for iron and decreases tolerance to copper in *Escherichia coli*

Zeling Xu, Pengchao Wang, Haibo Wang, Zuo Hang Yu, Ho Yu Au-Yeung, Tasuku Hirayama,  
Hongzhe Sun, and Aixin Yan

#### SUPPORTING INFORMATION:

**Figure S1.** *cusCFBA* system is induced in a CusRS dependent manner during Zn excess.

**Figure S2.** RT-qPCR analysis of the transcripts of *cueO* and *copA* during Zn excess in *E. coli* cells.

**Figure S3.** Copper sensitivity of wild-type *E. coli* strain with pET11a vector (Vector Ctrl), or *E. coli* MG1655 with ectopic over-expression of *cueO* (pET11a-*cueO*, *pcueO*) or *copA* (pET11a-*copA*, *pcopA*) in the presence of 0.1 mM or 0.25 mM Zn pretreatment.

**Figure S4.** Intracellular Fe(II) content measured using the probe HMRhoNox-M during Zn excess under aerobic (A) and anaerobic (B) conditions.

**Figure S5.** Growth of *E. coli* cells in the presence or absence of Zn excess (0.5 mM) under aerobic or anaerobic conditions.

**Figure S6.** Expression of Fur regulon genes involved in Fe uptake (*tonB*, *entC*, *fiu*, *feoA*, *fepA*, *fecA*) and storage (*fmA*) under Zn excess condition and during the adaption to Zn stress.

**Figure S7.** Activity of Tdh in *E. coli* cells at different time points following the switch to Zn excess condition.

**Table S1.** Bacterial strains used in this study

**Table S2.** Primers (for RT-qPCR) used in this study

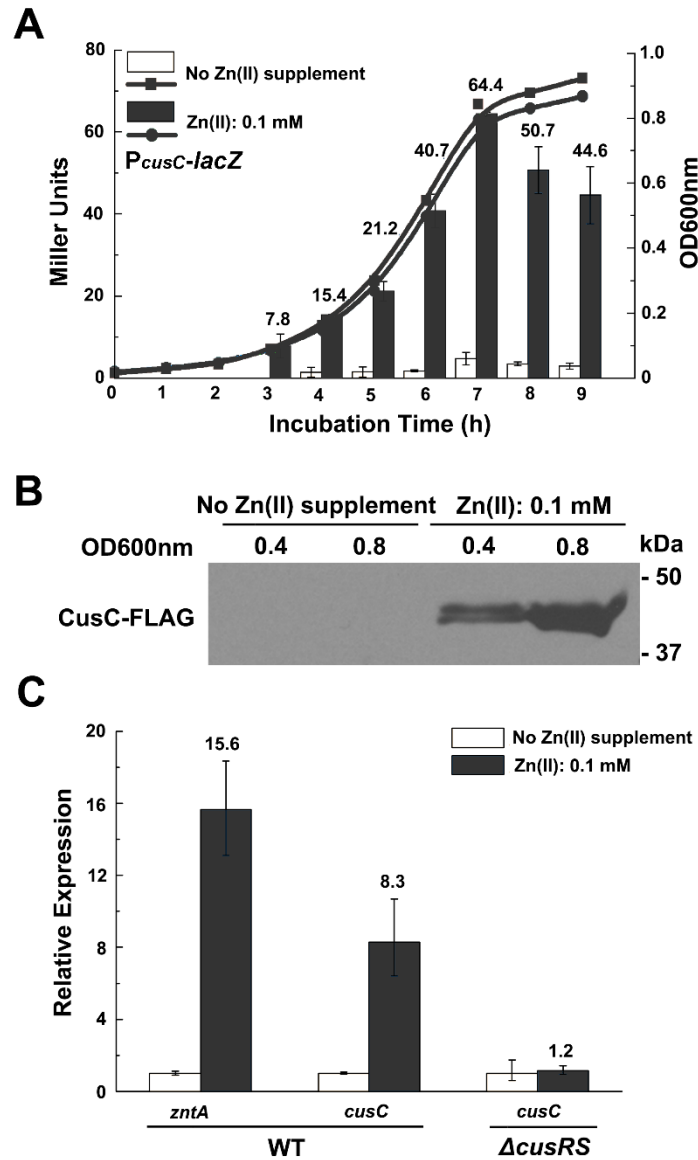

**Figure S1. *cusCFBA* system is induced in a CusRS dependent manner during Zn excess. (A)** Induction of  $P_{cusC}$ -*lacZ* during the growth of *E. coli* cells with Zn excess. **(B)** Western blot analysis to detect the production of chromosomal FLAG-tagged CusC protein during Zn excess at OD<sub>600</sub> value of 0.4 and 0.8. **(C)** Transcripts of *cusC* in wild-type *E. coli* and  $\Delta cusRS$  mutant during Zn excess measured by RT-qPCR. Expression of *zntA* served as the positive control.

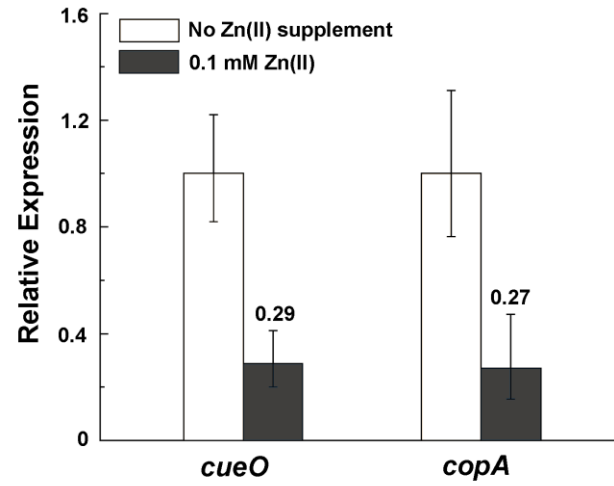

**Figure S2.** RT-qPCR analysis of the transcripts of *cueO* and *copA* during Zn excess in *E. coli* cells.

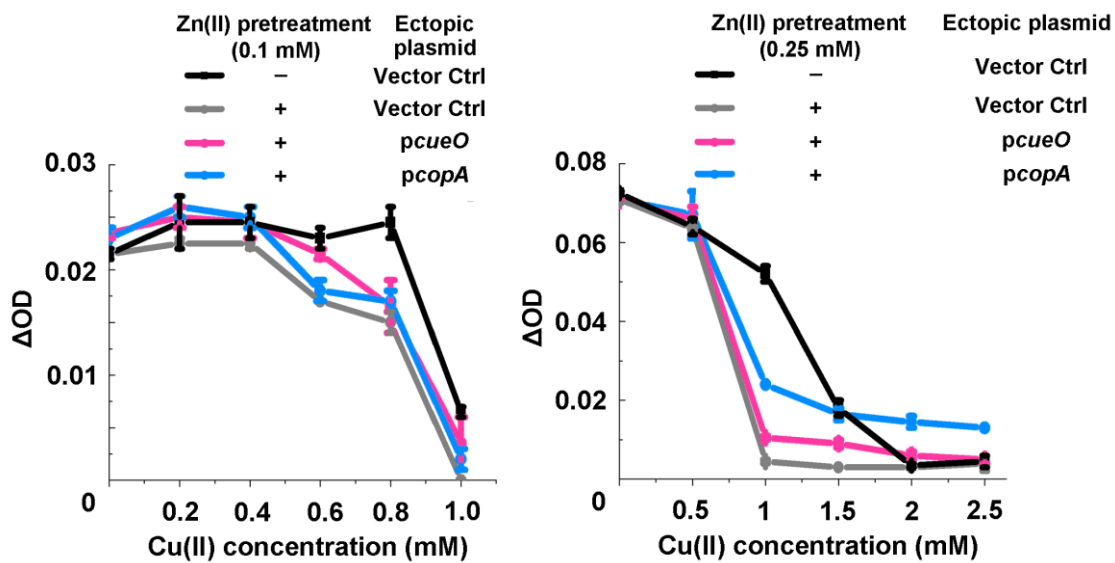

Figure S3. Copper sensitivity of wild-type *E. coli* strain with pET11a vector (Vector Ctrl), or *E. coli* MG1655 with ectopic over-expression of *cueO* (pET11a-*cueO*, *pcueO*) or *copA* (pET11a-*copA*, *pcopA*) in the presence of 0.1 mM or 0.25 mM Zn pretreatment.

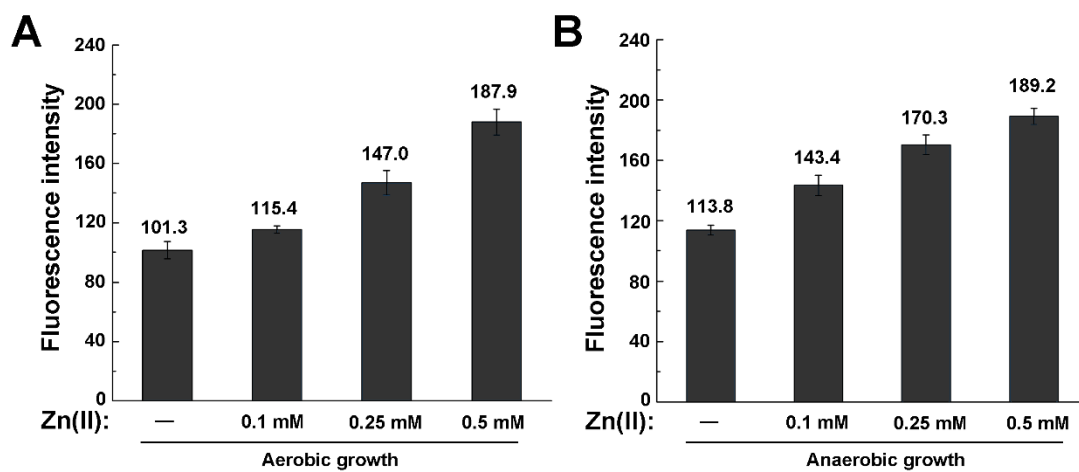

**Figure S4.** Intracellular Fe(II) content measured using the probe HMRhoNox-M during Zn excess under aerobic (**A**) and anaerobic (**B**) conditions.

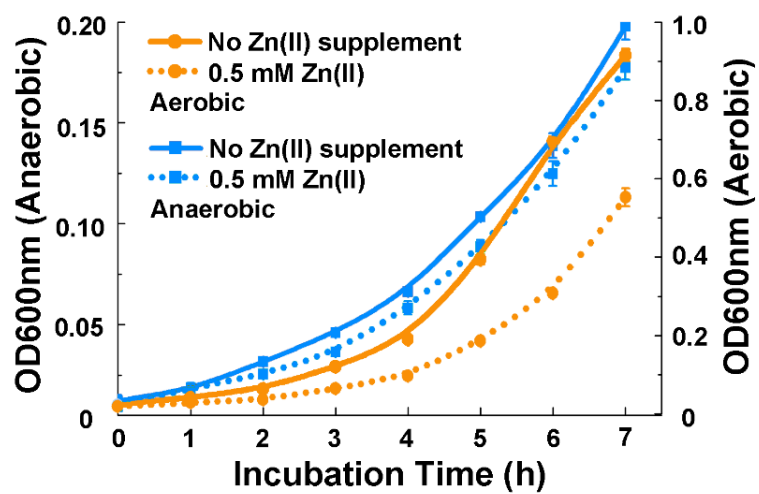

**Figure S5.** Growth of *E. coli* cells in the presence or absence of Zn excess (0.5 mM) under aerobic or anaerobic conditions. Error bars represent standard deviations.

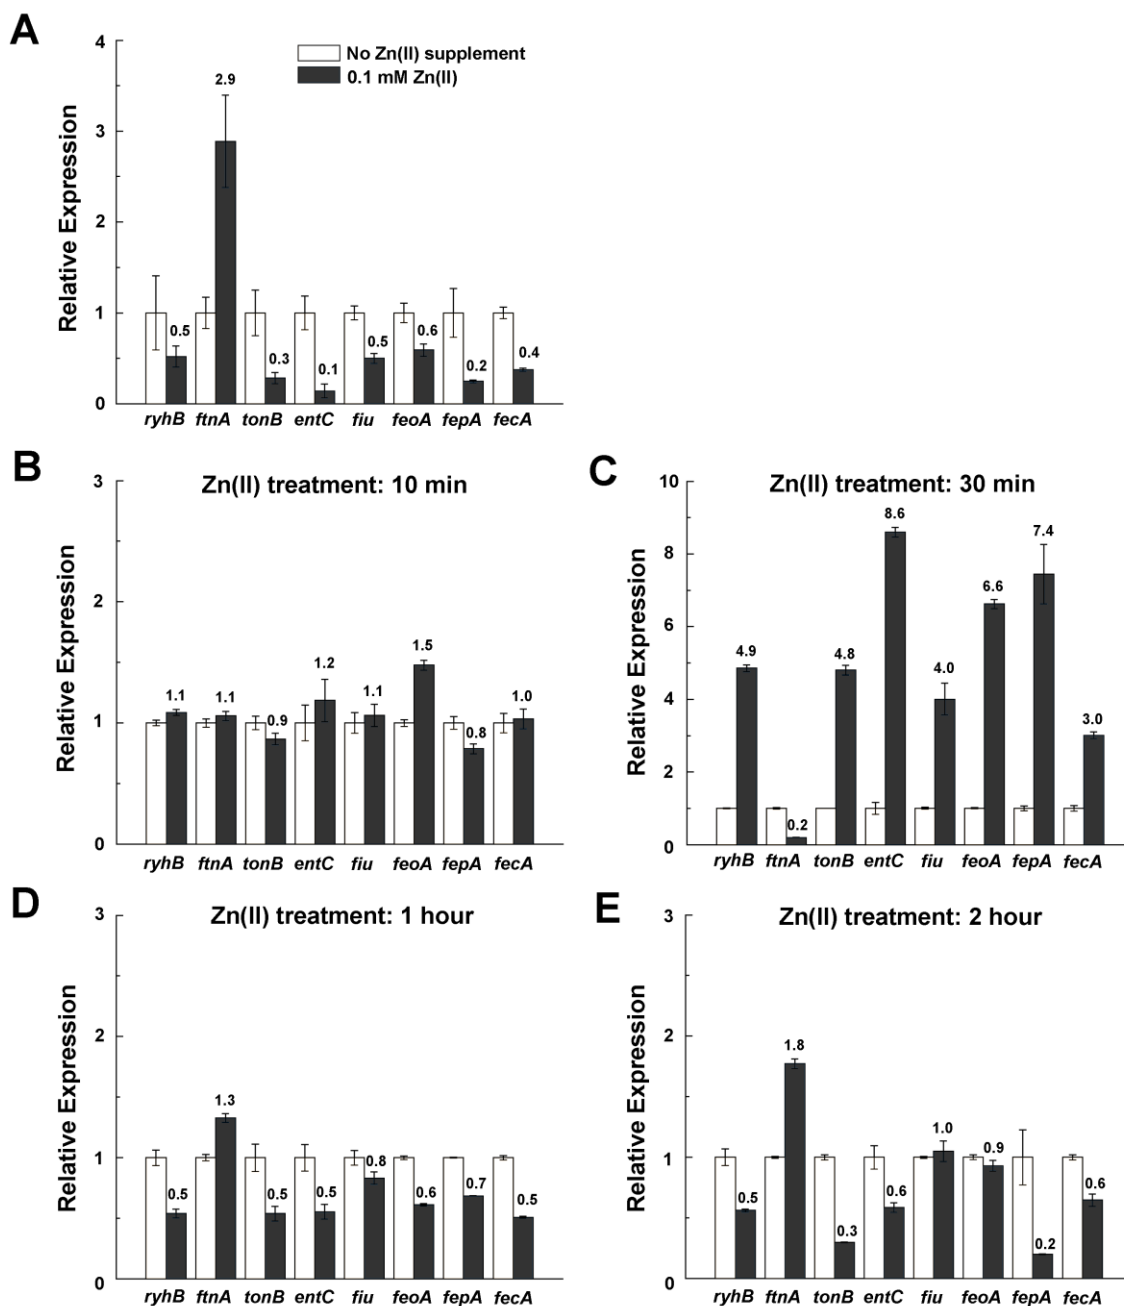

**Figure S6.** Expression of Fur regulon genes involved in Fe uptake (*tonB*, *entC*, *fiu*, *feoA*, *fepA*, *fecA*) and storage (*ftnA*) under Zn excess condition and during the adaption to Zn stress. **(A)** Cells were inoculated in Zn excess condition and grown to OD<sub>600</sub> of 0.4. **(B-E)** Cells were grown to OD<sub>600</sub> of 0.3 under non-Zn stressed condition and were subject to Zn stress for 10 min, 30 min, 1 hour, and 2 hour, respectively.

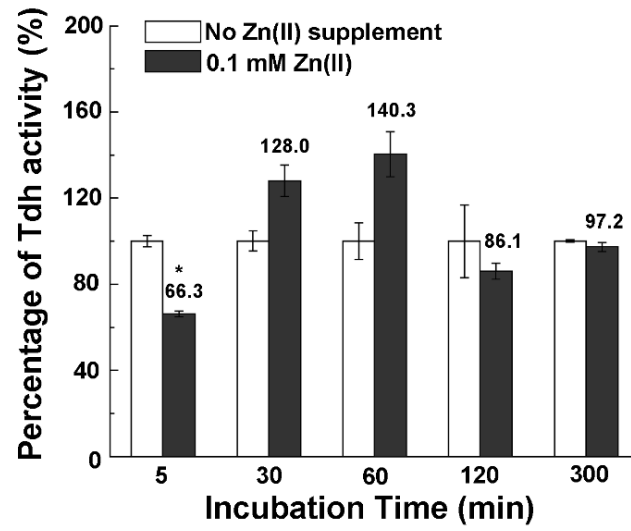

**Figure S7.** Activity of Tdh in *E. coli* cells at different time points following the switch to Zn excess condition. \*,  $P < 0.05$ ; versus no Zn treatment (Based on student's *t* test).



**Table S1.** Bacterial strains used in this study

| Strain No. | Genotype/plasmid                                                                                             | Source                             |
|------------|--------------------------------------------------------------------------------------------------------------|------------------------------------|
| MG1655     | <i>E. coli</i> F <sup>λ</sup> <i>ilvG rfb-50 rph-1</i>                                                       | Lab collection                     |
| AY1026     | MG1655 <i>cusC</i> -FLAG::Kn <sup>R</sup>                                                                    | Lab collection                     |
| AY1036     | MG1655 $\Delta$ <i>cusRS</i> ::CM <i>cusC</i> -FLAG::Kn <sup>R</sup>                                         | Lab collection                     |
| AY1038     | MG1655 $\Delta$ <i>cusRS</i> ::Cm <sup>R</sup>                                                               | Lab collection                     |
| AY1040     | MG1655 $\Delta$ <i>cusC</i> ::Kn <sup>R</sup>                                                                | Lab collection                     |
| AY1047     | MG1655 $\Delta$ <i>cusCFBA</i> ::Kn <sup>R</sup>                                                             | Lab collection                     |
| AY1051     | MG1655 $\Delta$ <i>copA</i> $\Delta$ <i>cueO</i> ::Kn <sup>R</sup>                                           | Lab collection                     |
| AY1005     | MG1655 $\Delta$ <i>lacZ</i> ::Kn <sup>R</sup> , P <sub><i>cusC</i></sub> - <i>lacZ</i>                       | Lab collection                     |
| AY1089     | MG1655 $\Delta$ <i>cusRS</i> $\Delta$ <i>lacZ</i> ::Kn <sup>R</sup> , P <sub><i>cusC</i></sub> - <i>lacZ</i> | Lab collection                     |
| AY1883     | MG1655 $\Delta$ <i>lacZ</i> ::Kn <sup>R</sup> , P <sub><i>copA</i></sub> - <i>lacZ</i>                       | Lab collection                     |
| AY3616     | MG1655 $\Delta$ <i>lacZ</i> ::Kn <sup>R</sup> , P <sub><i>cueO</i></sub> - <i>lacZ</i>                       | This study                         |
| AY3619     | <i>E. coli</i> BL21, pET28a-His <sub>6</sub> -CueR                                                           | This study                         |
| AY3660     | <i>E. coli</i> BL21, pET28a-CueR-F58TAG and PEvol-CouRS                                                      | This study                         |
| UTI-1      | uropathogenic <i>E. coli</i> clinical isolate                                                                | Queen Mary Hospital<br>(HONG KONG) |

**Table S2.** Primers (for RT-qPCR) used in this study

---

|                |                         |
|----------------|-------------------------|
| <i>zntA</i> -F | GAATCAACATGCGCCGCTGG    |
| <i>zntA</i> -R | TCTGTGCCGCTACCCATTGC    |
| <i>cusC</i> -F | CTATCAGAACGCGGGCTGGC    |
| <i>cusC</i> -R | GCACTTTCAGCGTCGCCATG    |
| <i>cueO</i> -F | TGGGCTGGTTTGGCGATACG    |
| <i>cueO</i> -R | GCCATTGAGCAAACGCAGGC    |
| <i>copA</i> -F | TGCGTAGTGATAGCGTGGCG    |
| <i>copA</i> -R | TGGCGGTGGTTGGGTTATCC    |
| <i>ryhB</i> -F | CCCTCGCGGAGAACCTGAAAG   |
| <i>ryhB</i> -R | CCCGGCTGGCTAAGTAATACTGG |
| <i>ftnA</i> -F | CGCCCAGGAAGAGATGACGC    |
| <i>ftnA</i> -R | TCAGCAAACGGAGATTCAACGG  |
| <i>tonB</i> -F | TCATGGTGCTGTTGTGGCGG    |
| <i>tonB</i> -R | TGTGGCGGTTTCGAGATCAGC   |
| <i>entC</i> -F | GACTCTGGCCTGTCTGCTGC    |
| <i>entC</i> -R | CCCACAATGCCGCCAAACAG    |
| <i>fiu</i> -F  | GGCGCTGTATCACCTGACGG    |
| <i>fiu</i> -R  | GTTGGCACTGTTACCGCTGC    |
| <i>feoA</i> -F | TCTTGGCATGTTACCTGGCTCC  |
| <i>feoA</i> -R | AGGCTCACACGACGGGTTTC    |
| <i>fepA</i> -F | CAACCAGGGCCATCAGTCCG    |
| <i>fepA</i> -R | CAATGGCGCGAAATCCCAGC    |
| <i>fecA</i> -F | CCAGTTCAGCCAGACAGCC     |
| <i>fecA</i> -R | CCCAGTAGTTACGCGGCGAG    |

---
